# Supplementary material for: Toxicity of a Binary Mixture of TiO2 and Imidacloprid Applied to Chlorella vulgaris
Source: MDPI journal article supplement (doi:10.3390/ijerph18157785), 2021-07-22
Supplement: s1 [file s1]

**Table S1.** Evaluation of physic-chemical parameters value of pH, conductivity and dissolved oxygen) on the effect of *Chlorella vulgaris* growth

| Day     | pH    | Conductivity<br>( $\mu\text{S/cm}$ ) | Dissolved<br>oxygen (ppm) |
|---------|-------|--------------------------------------|---------------------------|
| initial | 8.1   | 1365                                 | 5.62                      |
| 1       | 7.8   | 1363                                 | 5.63                      |
| 2       | 8.05  | 1508                                 | 6.16                      |
| 3       | 8.26  | 1465                                 | 5.74                      |
| 4       | 9     | 1254                                 | 6.26                      |
| 5       | 9.8   | 1441                                 | 6.94                      |
| 6       | 9.8   | 1455                                 | 7.3                       |
| 7       | 9.8   | 1334                                 | 7.94                      |
| 8       | 9.96  | 1430                                 | 6.54                      |
| 9       | 9.89  | 1470                                 | 7.65                      |
| 10      | 9.88  | 1616                                 | 7.55                      |
| 11      | 10.19 | 1448                                 | 7.01                      |
| 12      | 10.2  | 1430                                 | 8.33                      |
| 13      | 10.37 | 1443                                 | 8.37                      |
| 14      | 10.61 | 1421                                 | 7.94                      |

**Table S2.** Evaluation of physico-chemical parameters (value of pH, conductivity and dissolved oxygen) on the effect of *Chlorella vulgaris* growth in the presence of 0, 150 ... 2000 mg/L  $\text{TiO}_2\text{-P25/20}$ )

| Sample<br>(mg/L) | Initial parameters (0 h) |                                      |                              | Final parameters (after 120 h) |                                      |                              |
|------------------|--------------------------|--------------------------------------|------------------------------|--------------------------------|--------------------------------------|------------------------------|
|                  | pH                       | Conductivity<br>( $\mu\text{S/cm}$ ) | Dissolved<br>oxygen<br>(ppm) | pH                             | Conductivity<br>( $\mu\text{S/cm}$ ) | Dissolved<br>oxygen<br>(ppm) |
| control          | 8.1                      | 1341                                 | 7.8                          | 9                              | 1367                                 | 7.95                         |
| 150              | 8.1                      | 1339                                 | 7.67                         | 8.9                            | 1342                                 | 7.83                         |
| 300              | 8.1                      | 1339                                 | 7.43                         | 8.7                            | 1345                                 | 7.65                         |
| 600              | 8.1                      | 1337                                 | 7.71                         | 8.9                            | 1347                                 | 7.9                          |
| 1200             | 8.1                      | 1328                                 | 7.56                         | 8.8                            | 1349                                 | 7.77                         |
| 2000             | 8.1                      | 1324                                 | 7.49                         | 8.8                            | 1345                                 | 7.64                         |

**Table S3.** Evaluation of physico-chemical parameters (value of pH, conductivity and dissolved oxygen) on the effect of *Chlorella vulgaris* growth in the presence of 0, 5 ... 40 mg/L imidacloprid)

| Sample<br>(mg/L) | Initial parameters (0 h) |                                      |                              | Final parameters (after 120 h) |                                      |                              |
|------------------|--------------------------|--------------------------------------|------------------------------|--------------------------------|--------------------------------------|------------------------------|
|                  | pH                       | Conductivity<br>( $\mu\text{S/cm}$ ) | Dissolved<br>oxygen<br>(ppm) | pH                             | Conductivity<br>( $\mu\text{S/cm}$ ) | Dissolved<br>oxygen<br>(ppm) |
| control          | 8.1                      | 1341                                 | 7.8                          | 9                              | 1367                                 | 7.95                         |
| 5                | 8.1                      | 1335                                 | 7.26                         | 8.9                            | 1342                                 | 7.43                         |
| 10               | 8.1                      | 1328                                 | 7.51                         | 8.7                            | 1341                                 | 7.61                         |
| 20               | 8.1                      | 1330                                 | 7.7                          | 8.8                            | 1341                                 | 7.89                         |
| 30               | 8.1                      | 1333                                 | 7.3                          | 8.7                            | 1342                                 | 7.54                         |

|    |     |      |      |     |      |      |
|----|-----|------|------|-----|------|------|
| 40 | 8.1 | 1326 | 7.16 | 8.6 | 1346 | 7.34 |
|----|-----|------|------|-----|------|------|

**Table S4.** Evaluation of physico-chemical parameters (value of pH, conductivity and dissolved oxygen) on the effect of *Chlorella vulgaris* growth in the presence of mixture IMD and TiO<sub>2</sub> NPs)

| IMD<br>(mg/L) | TiO <sub>2</sub><br>(mg/L) | Initial parameters (0 h) |                               |                              | Final parameters (after 120 h) |                               |                              |
|---------------|----------------------------|--------------------------|-------------------------------|------------------------------|--------------------------------|-------------------------------|------------------------------|
|               |                            | pH                       | Conductivity<br>( $\mu$ S/cm) | Dissolved<br>oxygen<br>(ppm) | pH                             | Conductivity<br>( $\mu$ S/cm) | Dissolved<br>oxygen<br>(ppm) |
| 0             | 0                          | 8.1                      | 1341                          | 7.8                          | 9                              | 1367                          | 7.95                         |
|               | 150                        | 8.1                      | 1337                          | 7.67                         | 8.82                           | 1348                          | 7.71                         |
| 5             | 300                        | 8.1                      | 1341                          | 7.72                         | 8.76                           | 1354                          | 7.77                         |
|               | 600                        | 8.1                      | 1346                          | 7.64                         | 8.89                           | 1359                          | 7.78                         |
|               | 150                        | 8.1                      | 1340                          | 7.83                         | 8.69                           | 1353                          | 7.89                         |
| 10            | 300                        | 8.1                      | 1342                          | 7.81                         | 8.74                           | 1359                          | 7.9                          |
|               | 600                        | 8.1                      | 1344                          | 7.79                         | 8.85                           | 1368                          | 7.86                         |
|               | 150                        | 8.1                      | 1346                          | 7.87                         | 8.9                            | 1352                          | 7.9                          |
| 20            | 300                        | 8.1                      | 1348                          | 7.84                         | 8.97                           | 1364                          | 7.9                          |
|               | 600                        | 8.1                      | 1351                          | 7.86                         | 9                              | 1370                          | 7.89                         |

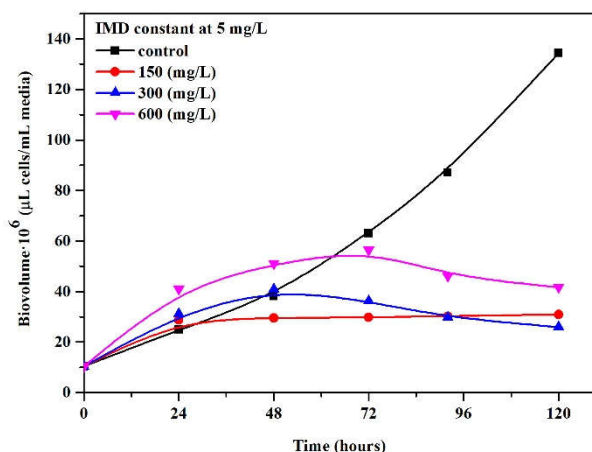

**Figure S1.** Time depending results of biovolume from a batch culture of *Chlorella Vulgaris* under toxic binary TiO<sub>2</sub> and IMD stress (IMD was kept constant at 5 mg/L).

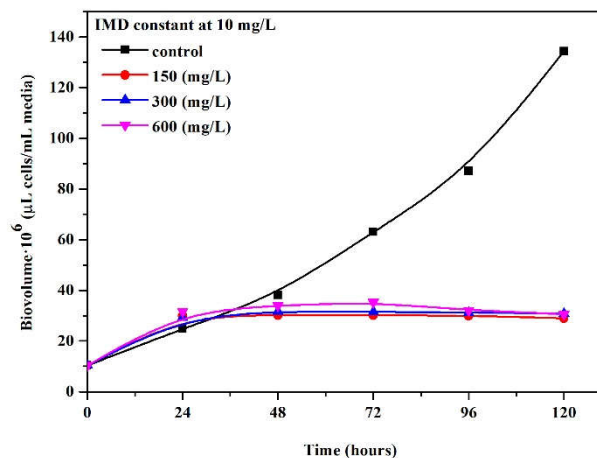

**Figure S2.** Time depending results of biovolume from a batch culture of *Chlorella Vulgaris* under toxic binary TiO<sub>2</sub> and IMD stress (IMD was kept constant at 10 mg/L).

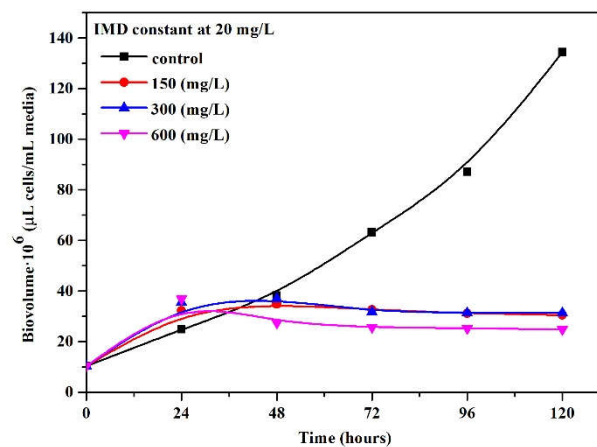

**Figure S3.** Time depending results of biovolume from a batch culture of *Chlorella Vulgaris* under toxic binary TiO<sub>2</sub> and IMD stress (IMD was kept constant at 20 mg/L).
